# Supplementary material
Source: publisher figshare collection journal article supplement (https://plos.figshare.com/articles/dataset/_/8001005)
Supplement: Supplementary file [file 1]

**A.**

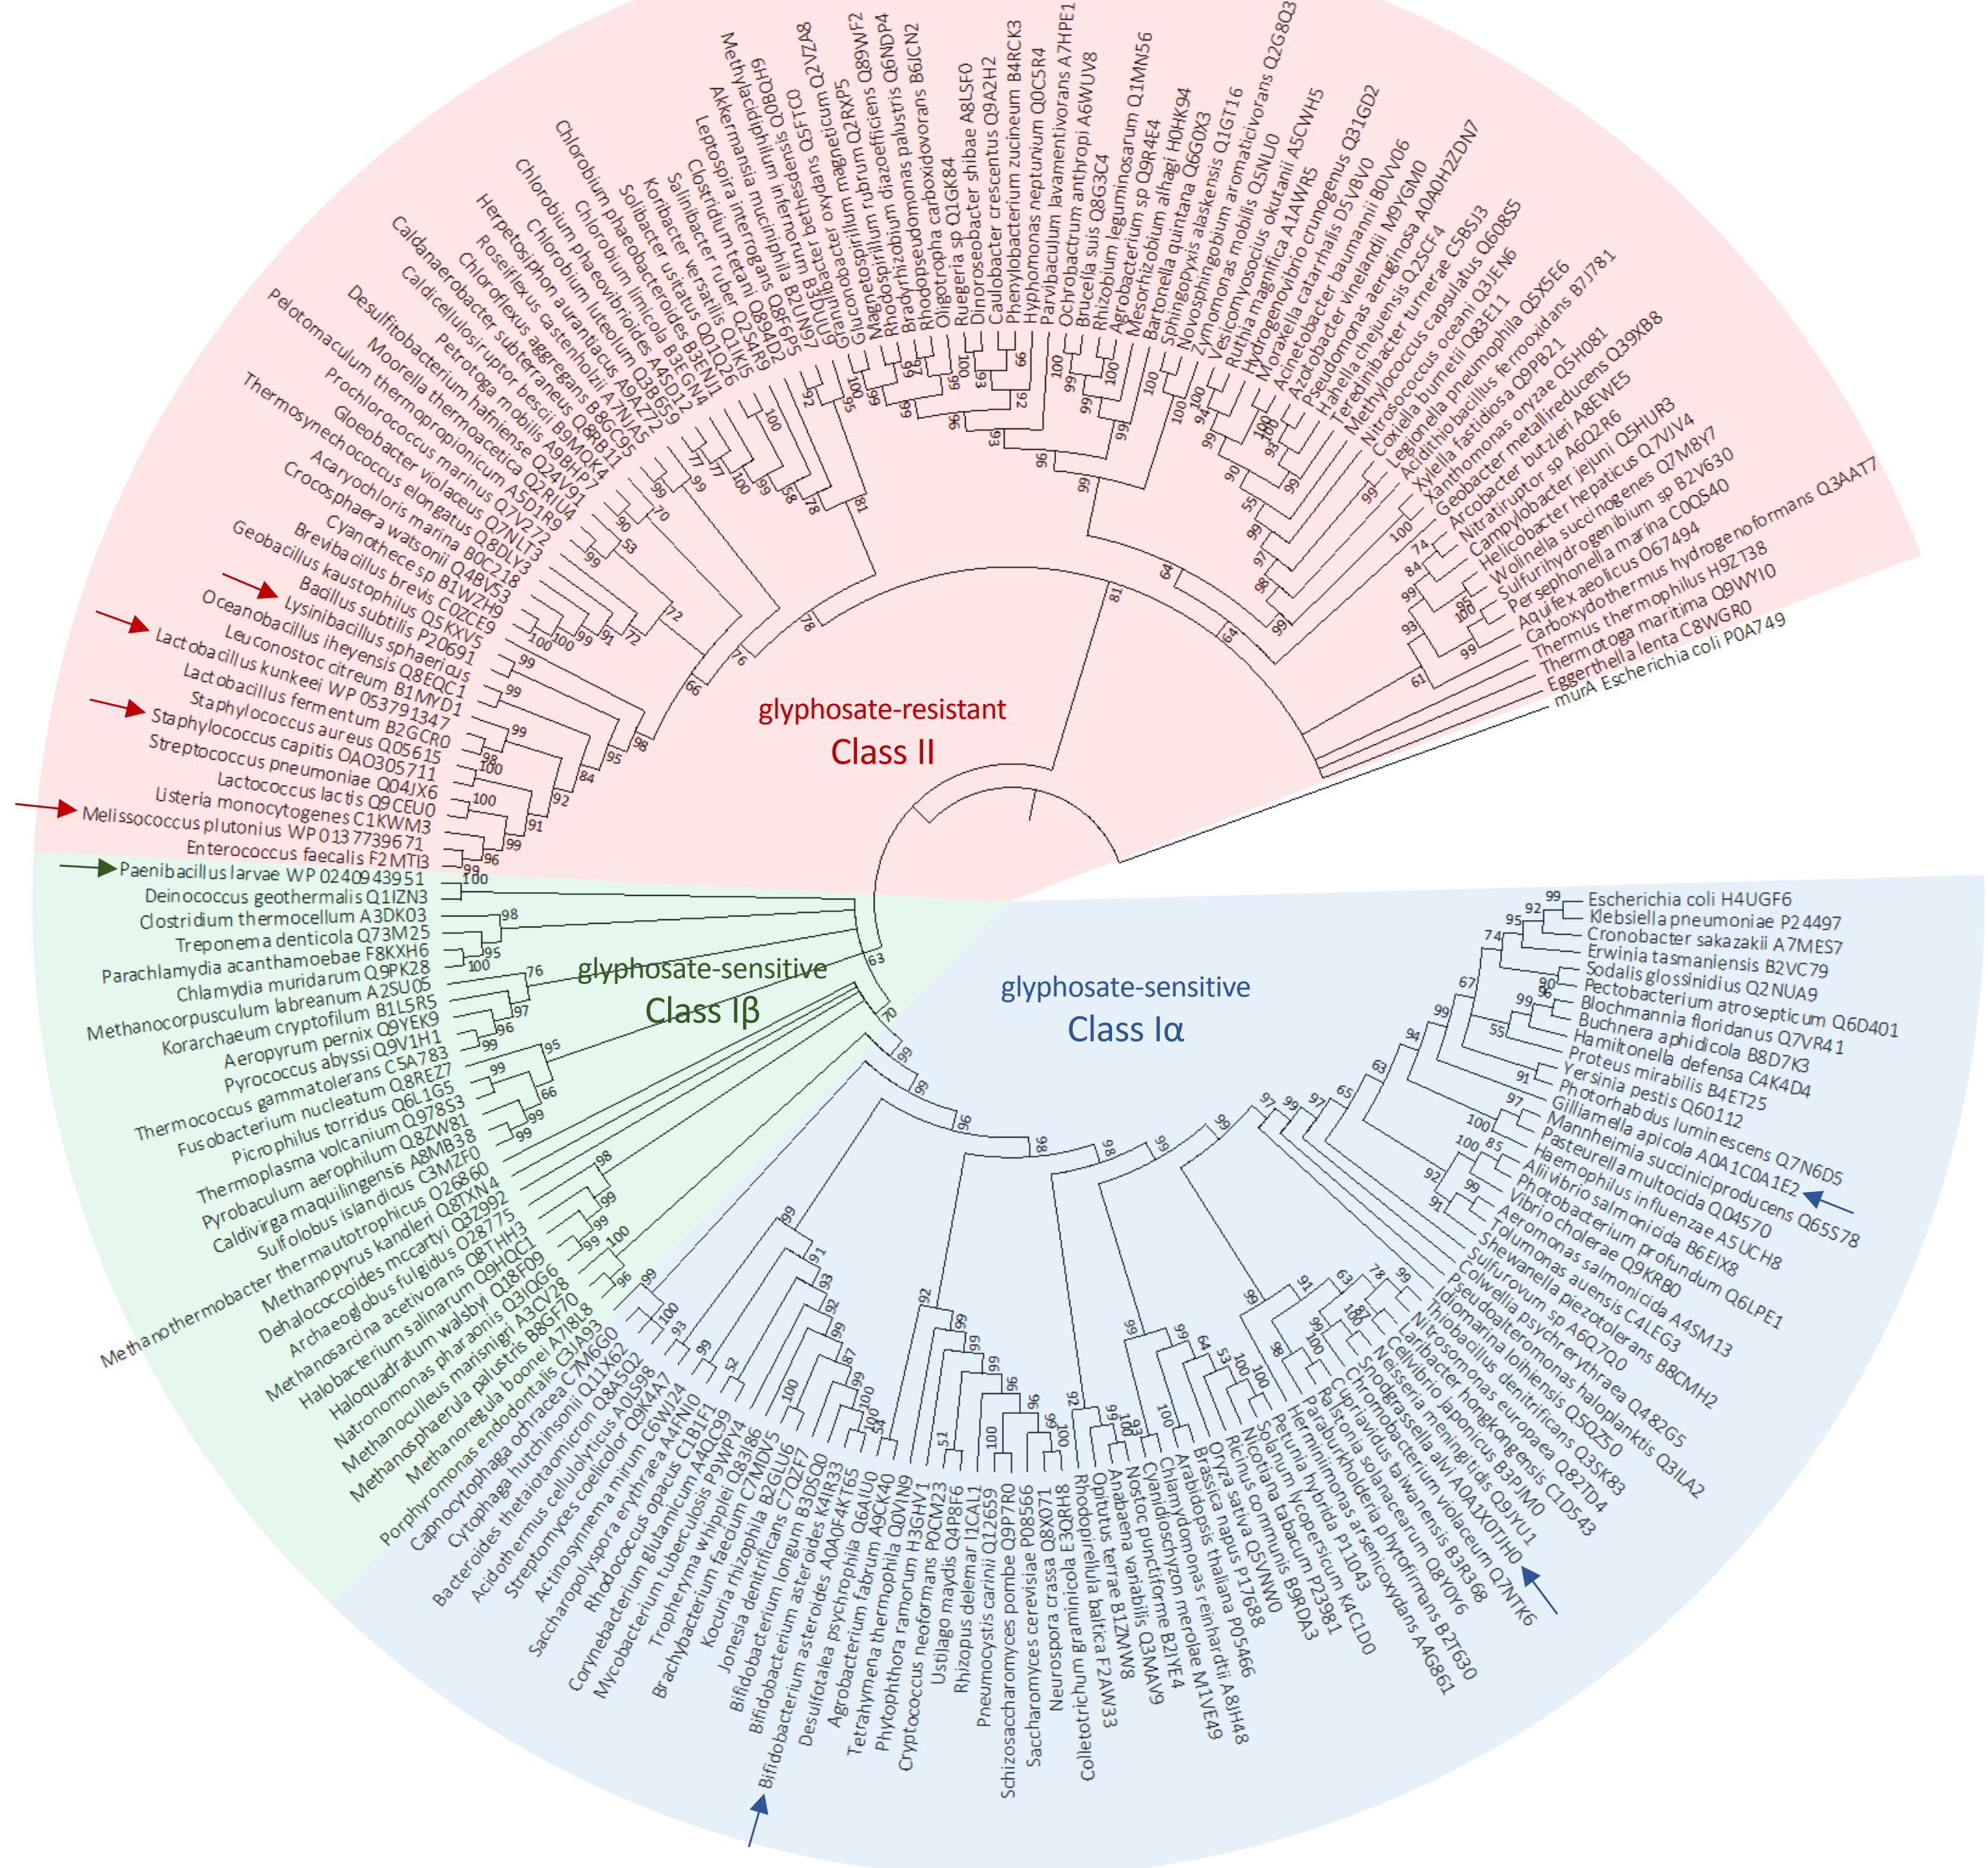

**B.**

| Position                                 |    |    |    |    |    |    |    |    |    |    |    |     |     |     |     |     |     |     |     |     |     |     |     |     |     |     |     |     |     |     |     |     |     |     |     |     |     |     |     |     |     |     |     |     |     |     |     |     |     |     |     |     |     |     |     |     |     |     |     |     |     |     |     |     |     |     |     |     |     |     |     |     |     |     |     |     |     |     |     |
|------------------------------------------|----|----|----|----|----|----|----|----|----|----|----|-----|-----|-----|-----|-----|-----|-----|-----|-----|-----|-----|-----|-----|-----|-----|-----|-----|-----|-----|-----|-----|-----|-----|-----|-----|-----|-----|-----|-----|-----|-----|-----|-----|-----|-----|-----|-----|-----|-----|-----|-----|-----|-----|-----|-----|-----|-----|-----|-----|-----|-----|-----|-----|-----|-----|-----|-----|-----|-----|-----|-----|-----|-----|-----|-----|-----|-----|-----|
| Class I<br>( <i>Vibrio cholerae</i> )    | 21 | 22 | 23 | 26 | 27 | 48 | 93 | 94 | 95 | 96 | 97 | 100 | 103 | 104 | 116 | 117 | 118 | 123 | 124 | 125 | 127 | 128 | 131 | 132 | 133 | 147 | 150 | 167 | 170 | 168 | 171 | 169 | 172 | 171 | 174 | 194 | 199 | 203 | 200 | 205 | 231 | 241 | 233 | 243 | 235 | 245 | 260 | 269 | 263 | 272 | 315 | 314 | 316 | 315 | 338 | 337 | 342 | 341 | 343 | 342 | 346 | 345 | 358 | 357 | 385 | 385 | 386 | 386 | 387 | 387 | 413 | 412 | 414 | 413 | 416 | 415 |     |     |     |
| Class II<br>( <i>Coxiella burnetii</i> ) | 20 | 21 | 22 | 23 | 25 | 26 | 27 | 48 | 93 | 94 | 95 | 96  | 97  | 99  | 100 | 103 | 104 | 116 | 117 | 118 | 123 | 124 | 125 | 127 | 128 | 131 | 132 | 133 | 147 | 150 | 167 | 170 | 168 | 171 | 169 | 172 | 171 | 174 | 194 | 199 | 203 | 200 | 205 | 231 | 241 | 233 | 243 | 235 | 245 | 260 | 269 | 263 | 272 | 315 | 314 | 316 | 315 | 338 | 337 | 342 | 341 | 343 | 342 | 346 | 345 | 358 | 357 | 385 | 385 | 386 | 386 | 387 | 387 | 413 | 412 | 414 | 413 | 416 | 415 |
| <b>Residue Class Ia</b>                  | S  | K  | S  | *  | R  | D  | *  | G  | T  | R  | *  | *   | *   | *   | *   | R   | P   | *   | *   | *   | *   | *   | P   | S   | S   | Q   | *   | *   | *   | T   | E   | D   | *   | *   | Q   | *   | *   | *   | *   | E   | R   | G   | D   | H   | R   | K   | *   | P   |     |     |     |     |     |     |     |     |     |     |     |     |     |     |     |     |     |     |     |     |     |     |     |     |     |     |     |     |     |     |     |
| <i>Snodgrassella alvi</i>                | S  | K  | S  | N  | R  | D  | N  | G  | T  | R  | A  | G   | V   | R   | P   | D   | A   | L   | P   | S   | S   | Q   | L   | K   | A   | T   | E   | D   | S   | Q   | Q   | D   | A   | S   | K   | E   | R   | G   | D   | H   | R   | K   | T   | P   |     |     |     |     |     |     |     |     |     |     |     |     |     |     |     |     |     |     |     |     |     |     |     |     |     |     |     |     |     |     |     |     |     |     |     |
| <i>Gilliamella apicola</i>               | S  | K  | S  | N  | R  | D  | N  | G  | T  | R  | A  | G   | E   | R   | P   | H   | A   | L   | P   | S   | S   | Q   | L   | K   | D   | T   | E   | D   | S   | K   | Q   | D   | A   | N   | K   | E   | R   | G   | D   | H   | R   | K   | T   | P   |     |     |     |     |     |     |     |     |     |     |     |     |     |     |     |     |     |     |     |     |     |     |     |     |     |     |     |     |     |     |     |     |     |     |     |
| <i>Bifidobacterium asteroides</i>        | S  | K  | S  | N  | R  | D  | L  | G  | T  | R  | G  | G   | D   | R   | P   | P   | G   | L   | P   | S   | S   | Q   | L   | L   | T   | T   | E   | D   | S   | D   | Q   | E   | A   | H   | H   | E   | R   | G   | D   | H   | R   | K   | T   | P   |     |     |     |     |     |     |     |     |     |     |     |     |     |     |     |     |     |     |     |     |     |     |     |     |     |     |     |     |     |     |     |     |     |     |     |
| <b>Residue Class Ib</b>                  | S  | K  | *  | *  | R  | *  | *  | *  | *  | *  | *  | *   | *   | *   | *   | R   | P   | *   | *   | *   | *   | *   | S   | S   | Q   | *   | *   | *   | T   | *   | D   | *   | *   | *   | D   | *   | *   | K   | E   | R   | G   | D   | H   | R   | *   | *   | *   |     |     |     |     |     |     |     |     |     |     |     |     |     |     |     |     |     |     |     |     |     |     |     |     |     |     |     |     |     |     |     |     |
| <i>Paenibacillus larvae</i>              | S  | K  | N  | T  | R  | D  | N  | G  | A  | R  | S  | Y   | P   | R   | P   | D   | A   | L   | P   | S   | S   | Q   | L   | K   | G   | T   | Q   | D   | P   | N   | Q   | D   | A   | N   | K   | E   | R   | G   | D   | H   | R   | K   | S   | P   |     |     |     |     |     |     |     |     |     |     |     |     |     |     |     |     |     |     |     |     |     |     |     |     |     |     |     |     |     |     |     |     |     |     |     |
| <b>Residue Class II</b>                  | D  | K  | S  | H  | R  | D  | N  | *  | *  | R  | G  | G   | D   | R   | P   | R   | P   | L   | *   | S   | A   | Q   | K   | R   | E   | *   | P   | D   | S   | N   | R   | D   | E   | E   | K   | E   | R   | *   | D   | H   | R   | *   | S   | P   |     |     |     |     |     |     |     |     |     |     |     |     |     |     |     |     |     |     |     |     |     |     |     |     |     |     |     |     |     |     |     |     |     |     |     |
| <i>Lactobacillus kunkeei</i>             | D  | K  | S  | H  | R  | D  | N  | G  | T  | R  | G  | G   | D   | R   | P   | R   | P   | L   | P   | S   | A   | Q   | K   | R   | E   | M   | P   | D   | S   | N   | R   | D   | E   | E   | K   | E   | R   | G   | D   | H   | R   | I   | S   | P   |     |     |     |     |     |     |     |     |     |     |     |     |     |     |     |     |     |     |     |     |     |     |     |     |     |     |     |     |     |     |     |     |     |     |     |
| <i>Lysinibacillus sphaericus</i>         | D  | K  | S  | H  | R  | D  | N  | G  | T  | R  | G  | G   | D   | R   | P   | R   | P   | L   | P   | S   | A   | Q   | K   | R   | E   | M   | P   | D   | S   | N   | R   | D   | E   | E   | K   | E   | R   | G   | D   | H   | R   | V   | S   | P   |     |     |     |     |     |     |     |     |     |     |     |     |     |     |     |     |     |     |     |     |     |     |     |     |     |     |     |     |     |     |     |     |     |     |     |
| <i>Melissococcus plutonius</i>           | D  | K  | S  | H  | R  | D  | N  | G  | T  | R  | G  | G   | D   | R   | P   | R   | P   | L   | P   | S   | A   | Q   | K   | R   | E   | M   | P   | D   | S   | N   | R   | D   | E   | E   | K   | E   | R   | G   | D   | H   | R   | V   | S   | P   |     |     |     |     |     |     |     |     |     |     |     |     |     |     |     |     |     |     |     |     |     |     |     |     |     |     |     |     |     |     |     |     |     |     |     |
| <i>Staphylococcus capitis</i>            | D  | K  | S  | H  | R  | D  | N  | G  | T  | R  | G  | G   | D   | R   | P   | R   | P   | L   | P   | S   | A   | Q   | K   | R   | E   | M   | P   | D   | S   | N   | R   | D   | E   | E   | K   | E   | R   | G   | D   | H   | R   | V   | S   | P   |     |     |     |     |     |     |     |     |     |     |     |     |     |     |     |     |     |     |     |     |     |     |     |     |     |     |     |     |     |     |     |     |     |     |     |

**S5 Fig. Phylogenetic analysis (A) and conserved amino acids (B) of 5-enolpyruvylshikimate-3-phosphate synthases (EPSPS).** (A) amino acid sequences were taken from a previously reported phylogenetic tree [1], and sequences of species phylogenetically related to the isolated strains were selected in GenBank. *E. coli* MurA sequence was used as an outgroup belonging to the EPSPS family. Sequences were aligned using Muscle and trimmed to 726 sites (amino acids 4 to 419 of *V. cholerae* reference sequence). Le and Gascuel model with discrete Gamma distribution and allowance for invariant sites (LG+I+G) was selected as best-fit model of protein evolution using ProtTest [2]. The Bayesian phylogenetic tree was inferred using MrBayes V3.2.6 software [3], with branch probabilities evaluated from 865 000 simulations and 15% burn-in. The consensus phylogenetic tree was built by majority greedy clustering with  $\geq 0.5$  support probability. The glyphosate-sensitive Class Ia and Class Ib and the glyphosate-resistant Class II EPSPS are indicated in blue, green and red respectively. (B) Presence of the conserved amino acid residues characteristic of Classes Ia (blue), Ib (green) and II (red) according to Light *et al.* [1] in the representative species mentioned in A. Positions are given for reference sequences from *V. cholerae* (Class I) and *C. burnetii* (Class II). Stars (\*) indicate non-conserved amino acids.

### References :

1. Light SH, Krishna SN, Minasov G, Anderson WF. An unusual cation-binding site and distinct domain-domain interactions distinguish Class II enolpyruvylshikimate-3-phosphate synthases. *Biochemistry*. 2016;55: 1239-1245.
2. Darriba D, Taboada GL, Doallo R, Posada D. ProtTest 3: fast selection of best-fit models of protein evolution. *Bioinformatics*. 2011;27: 1164-1165.
3. Ronquist F, Teslenko M, van der Mark P, Ayres DL, Darling A, Höhna S, Larget B, Liu L, Suchard MA, Huelsenbeck JP. Efficient Bayesian phylogenetic inference and model choice across a large model space. *Systematic Biology*. 2012;61: 539-542.
