# Supplementary material
Source: publisher figshare collection journal article supplement (https://plos.figshare.com/articles/dataset/_/8001005)
Supplement: Supplementary file [file 1]

**S1 Table. Primers used in the study**

| Targeted group                                            | Primer pairs and sequences (5'→3')                                                   | Reference                                                                                                                                                                                                                                                   |
|-----------------------------------------------------------|--------------------------------------------------------------------------------------|-------------------------------------------------------------------------------------------------------------------------------------------------------------------------------------------------------------------------------------------------------------|
| <b>Primers amplifying SSU fragments for QPCR analyses</b> |                                                                                      |                                                                                                                                                                                                                                                             |
| Bacteria                                                  | 341F CCTACGGGAGGCAGCAG<br>534R ATTACCGCGGCTGCTGGCA                                   | Bru D, Martin-Laurent F, Philippot L. Quantification of the detrimental effect of a single primer-template mismatch by real-time PCR using the 16S rRNA gene as an example. <i>Appl Environ Microbiol.</i> 2008;74: 1660-1663                               |
| Bacteria                                                  | BAC338F ACTCCTACGGGAGGCAG<br>BAC805R GACTACCAGGTATCTAATCC                            | Yu Y, Lee C, Kim J, Hwang S. Group-specific primer and probe sets to detect methanogenic communities using quantitative real-time polymerase chain reaction. <i>Biotechnol Bioeng.</i> 2005;89: 670-679                                                     |
| <i>Bifidobacterium</i> spp.                               | Bifi-F2 TCGCGTCYGGTGTGAAAG<br>Bifi-R2 CCACATCCAGCRTCCAC                              | Rinttilä T, Kassinen A, Malinen E, Krogus L, Palva A. Development of an extensive set of 16S rDNA-targeted primers for quantification of pathogenic and indigenous bacteria in faecal samples by real-time PCR. <i>J Appl Microbiol.</i> 2004;97: 1166-1177 |
| <i>Lactobacillus</i> Firm-5                               | Lact-F TAACGCATTAAGCACTCC<br>Lact-R GCTGGCAACTAATAATAAGG                             | Li J, Qin H, Wu J, Sadd BM, Wang X, Evans JD, Peng W, Chen Y. The prevalence of parasites and pathogens in Asian honeybees <i>Apis cerana</i> in China. <i>PLoS One.</i> 2012;7: e47955                                                                     |
| <i>Lactobacillus</i> spp.                                 | Lact-F2 AGCAGTAGGGAATCTTCCA<br>Lact-R2 CACCGCTACACATGGAG                             | Rinttilä T, Kassinen A, Malinen E, Krogus L, Palva A. Development of an extensive set of 16S rDNA-targeted primers for quantification of pathogenic and indigenous bacteria in faecal samples by real-time PCR. <i>J Appl Microbiol.</i> 2004;97: 1166-1177 |
| $\alpha$ -proteobacteria                                  | a682F CDAGTGTAGAGGTGAAATT<br>908aR CCCCCTCAATTCCTTTGAGTT                             | Bacchetti de Gregoris T, Aldred N, Clare AS, Burgess JG. Improvement of phylum- and class-specific primers for real-time PCR quantification of bacterial taxa. <i>J Microbiol Methods.</i> 2011;86: 351-356                                                 |
| <i>Snodgrassella alvi</i>                                 | Neiss-F AAGCGGTGGATGATGTGG<br>Neiss-R TGATGGCAACTAATGACAAGG                          | Li J, Qin H, Wu J, Sadd BM, Wang X, Evans JD, Peng W, Chen Y. The prevalence of parasites and pathogens in Asian honeybees <i>Apis cerana</i> in China. <i>PLoS One.</i> 2012;7: e47955                                                                     |
| <i>Snodgrassella alvi</i>                                 | Beta-1009-qtF CTTAGAGATAGGAGAGTG<br>Beta-1115-qtR AATGATGGCAACTAATGACAA              | Martinson VG, Moy J, Moran NA. Establishment of characteristic gut bacteria during development of the honeybee worker. <i>Appl Environ Microbiol.</i> 2012;78: 2830-2840                                                                                    |
| <i>Gilliamella apicola</i>                                | G1-459-qtF GTATCTAATAGGTGCATCAATT<br>G1-648-qtR TCCTCTACAATACTCTAGTT                 | Martinson VG, Moy J, Moran NA. Establishment of characteristic gut bacteria during development of the honeybee worker. <i>Appl Environ Microbiol.</i> 2012;78: 2830-2840                                                                                    |
| <i>Gilliamella apicola</i>                                | Gill-F CCTTTGTTGCCATCGATTAGG<br>Gill-R GACATTCTGATTCACGATTACTAGC                     | Xu LL, Wu J, Guo J, Li JL. Dynamic variation of symbionts in Bumblebees during hosts growth and development. <i>Sci. Agric. Sinica.</i> 2014;47: 2030–2037                                                                                                  |
| <b>Primers amplifying the SSU for sequencing</b>          |                                                                                      |                                                                                                                                                                                                                                                             |
| Bacteria                                                  | 27f-YM AGAGTTTGATYMTGGCTCAG<br>27f-Bif AGGGTTCGATTCTGGCTCAG<br>1492r TACCTGTTAYGACTT | Frank JA, Reich CI, Sharma S, Weisbaum JS, Wilson BA, Olsen GJ. Critical evaluation of two primers commonly used for amplification of bacterial 16S rRNA genes. <i>Appl Environ Microbiol.</i> 2008;74: 2461-2470                                           |
